# Supplementary material for: Prevalence and molecular characterization of glucose-6-phosphate dehydrogenase deficiency in the Lue ethnic group of northern Thailand
Source: PubMed Central journal article supplement (PMC7858617; doi:10.1038/s41598-021-82477-w), 2021-02-03
Supplement: 41598_2021_82477_MOESM1_ESM.pdf [file 41598_2021_82477_MOESM1_ESM.pdf]

## **Prevalence and Molecular Characterization of Glucose-6- Phosphate Dehydrogenase Deficiency in the Lue Ethnic Group of Northern Thailand**

Suwapat Sathupak<sup>1,2</sup> Kamonlak Leecharoenkiat<sup>3</sup> and Jatupol Kampuansai<sup>1,4\*</sup>

<sup>1</sup>*Department of Biology, Faculty of Science, Chiang Mai University, Chiang Mai, Thailand*

<sup>2</sup>*Graduate School, Chiang Mai University, Chiang Mai, Thailand*

<sup>3</sup>*Oxidation in Red Cell Disorders Research Unit, Department of Clinical Microscopy, Faculty of Allied Health Sciences, Chulalongkorn University, Bangkok, Thailand*

<sup>4</sup>*Research Center in Bioresources for Agriculture, Industry and Medicine, Chiang Mai University, Chiang Mai, Thailand*

*\*Corresponding author: [jatupol.k@cmu.ac.th](mailto:jatupol.k@cmu.ac.th)*

**Supplementary Table 1** Primer sequences and exon of G6PD gene amplified

| Exon       | Primer                                                             | Annealing Temp. (°C) | Size (bp) |
|------------|--------------------------------------------------------------------|----------------------|-----------|
| 2          | 5'-CTCAAGAAAGGGGCTAACTTCTCAA-3'<br>5'-GGAATTCCTGGCTTTTAAGATTGGG-3' | 52                   | 241       |
| 3, 4       | 5'-AGGATGATGTATGTAGGTCG-3'<br>5'-CCGAAGTTGGCCATGCTGGG-3'           | 55                   | 378       |
| 5          | 5'-GTGTGTCTGTCTGTCCGTGTC-3'<br>5'-CACGCTCATAGAGTGGTGGG-3'          | 55                   | 320       |
| 6, 7       | 5'-GGGAGGGCGTCTGAATGA-3'<br>5'-CCAGCCTCCAGGAGAGAGG-3'              | 55                   | 572       |
| 8          | 5'-CATGCCCTTGAACCAGGTGA-3'<br>5'-GCATGCACACCCCAGCTC-3'             | 54                   | 241       |
| 9, 10      | 5'-TTCTCTCCCTTGGCTTTCTC-3'<br>5'-AAGACGTCCAGGATGAGGTGATC-3'        | 51                   | 737       |
| 11, 12, 13 | 5'-GAAGCCGGGCATGTTCTTCAAC-3'<br>5'-GTCAATGGTCCCGGAGTC-3'           | 56                   | 721       |

**Supplementary Table 2.** General data of G6PD deficiency prevalence among ethnic groups residing in the upper Greater Mekong Subregion for the purposes of comparison

| Ethnicity       | Linguistic Family | No. of samples | No. of G6PD deficiency |        |       | Prevalence (%) | Reference           |
|-----------------|-------------------|----------------|------------------------|--------|-------|----------------|---------------------|
|                 |                   |                | Male                   | Female | Total |                |                     |
| Mon1*           | Austroasiatic     | 162            | 19                     |        | 19    | 11.73          | Nuchphayoon (2008)  |
| Khmer1          | Austroasiatic     | 322            | 25                     | 15     | 40    | 12.42          | Matsuoka (2005)     |
| Khmer2          | Austroasiatic     | 208            | 1                      | 1      | 2     | 0.97           | Matsuoka (2005)     |
| Khmer3          | Austroasiatic     | 135            | 2                      |        | 2     | 1.48           | Matsuoka (2005)     |
| Mon2*           | Austroasiatic     | 45             | 3                      |        | 3     | 6.67           | Iwai et al (2001)   |
| Yao             | Hmong–Mien        | 3056           | 31                     | 23     | 54    | 1.77           | Jiang et al. (2006) |
| Han             | Sino-Tibetan      | 133752         | 3084                   | 2546   | 5630  | 4.21           | Jiang et al. (2006) |
| Hakka           | Sino-Tibetan      | 2607           | 81                     | 27     | 108   | 4.14           | Jiang et al. (2006) |
| She             | Sino-Tibetan      | 1962           | 71                     | 37     | 108   | 5.50           | Jiang et al. (2006) |
| Bai             | Sino-Tibetan      | 5292           | 43                     | 23     | 66    | 1.25           | Jiang et al. (2006) |
| Yi              | Sino-Tibetan      | 442            | 18                     | 5      | 23    | 5.20           | Jiang et al. (2006) |
| Jingpo          | Sino-Tibetan      | 192            | 19                     | 12     | 31    | 16.15          | Jiang et al. (2006) |
| Hani            | Sino-Tibetan      | 495            | 23                     | 13     | 36    | 7.27           | Jiang et al. (2006) |
| Ji Ruo          | Sino-Tibetan      | 322            | 46                     |        | 46    | 14.29          | Jiang et al. (2006) |
| Kachin (Jingpo) | Sino-Tibetan      | 1770           | 187                    | 336    | 523   | 29.55          | Li et al. (2015)    |
| Kachin1         | Sino-Tibetan      | 100            | 12                     | 12     | 24    | 24.00          | Deng et al. (2017)  |
| Jingpo          | Sino-Tibetan      | 372            | 12                     | 10     | 22    | 5.91           | He et al. (2018)    |
| Burmese1*       | Sino-Tibetan      | 178            | 17                     |        | 17    | 9.55           | Nuchphayoon (2008)  |
| Burmese2*       | Sino-Tibetan      | 529            | 39                     |        | 39    | 7.37           | Iwai et al (2001)   |
| Danu*           | Sino-Tibetan      | 28             | 2                      |        | 2     | 7.14           | Iwai et al (2001)   |
| Kachin2*        | Sino-Tibetan      | 128            | 8                      |        | 8     | 6.25           | Iwai et al (2001)   |
| Chinese*        | Sino-Tibetan      | 90             | 4                      |        | 4     | 4.44           | Iwai et al (2001)   |

|        |              |      |     |     |     |       |                     |
|--------|--------------|------|-----|-----|-----|-------|---------------------|
| Lisu*  | Sino-Tibetan | 38   | 1   |     | 1   | 2.63  | Iwai et al (2001)   |
| Akha*  | Sino-Tibetan | 45   | 0   |     | 0   | 0.00  | Iwai et al (2001)   |
| Zhaung | Tai-Kadai    | 5255 | 338 | 156 | 494 | 9.40  | Jiang et al. (2006) |
| Dai1   | Tai-Kadai    | 504  | 63  | 24  | 87  | 17.26 | Jiang et al. (2006) |
| Dai2   | Tai-Kadai    | 1530 | 68  | 64  | 132 | 8.63  | He et al. (2018)    |
| Shan*  | Tai-Kadai    | 37   | 4   |     | 4   | 10.81 | Iwai et al (2001)   |
| Lao*   | Tai-Kadai    | 291  | 21  |     | 21  | 7.22  | Iwai et al (2001)   |
| Lue    | Tai-Kadai    | 296  | 20  | 20  | 40  | 13.51 | Current study       |

\*data obtained from males only

**Supplementary Table 3.** G6PD enzyme activity and molecular typing of 58 G6PD variant carriers observed in the Lue population

| Population | Gender | G6PD unit<br>(mU/ eryocyte per ml) | Hb<br>(g/dL) | G6PD activity<br>(U/g Hb) | G6PD typing | WHO group | Female<br>(Homo/Hetero) |
|------------|--------|------------------------------------|--------------|---------------------------|-------------|-----------|-------------------------|
| Lue5       | F      | 60                                 | 13.3         | 0.45                      | Kaiping     | 2         | Hetero                  |
| Lue5       | F      | 290                                | 12.3         | 2.36                      | Kaiping     | 2         | Hetero                  |
| Lue6       | F      | 350                                | 13.7         | 2.55                      | Coimbra     | 2         | Hetero                  |
| Lue1       | F      | 374                                | 14.1         | 2.65                      | Union       | 2         | Hetero                  |
| Lue6       | F      | 428                                | 14.6         | 2.93                      | Kaiping     | 2         | Hetero                  |
| Lue2       | F      | 365                                | 11.5         | 3.17                      | Kaiping     | 2         | Hetero                  |
| Lue3       | F      | 433                                | 13.1         | 3.31                      | Kaiping     | 2         | Hetero                  |
| Lue1       | F      | 431                                | 12.1         | 3.56                      | Union       | 2         | Hetero                  |
| Lue1       | F      | 540                                | 13.1         | 4.12                      | Union       | 2         | Hetero                  |
| Lue5       | F      | 667                                | 14.7         | 4.54                      | Kaiping     | 2         | Hetero                  |
| Lue3       | F      | 705                                | 12.4         | 5.69                      | Union       | 2         | Hetero                  |
| Lue5       | F      | 812                                | 14.2         | 5.72                      | Kaiping     | 2         | Hetero                  |
| Lue3       | F      | 769                                | 13.2         | 5.83                      | Kaiping     | 2         | Hetero                  |
| Lue3       | F      | 745                                | 12.1         | 6.16                      | Kaiping     | 2         | Hetero                  |
| Lue2       | F      | 847                                | 13.2         | 6.42                      | Kaiping     | 2         | Hetero                  |
| Lue6       | F      | 981                                | 13           | 7.55                      | Kaiping     | 2         | Hetero                  |
| Lue5       | F      | 930                                | 11           | 8.45                      | Kaiping     | 2         | Hetero                  |
| Lue1       | F      | 1031                               | 11.2         | 9.21                      | Union       | 2         | Hetero                  |
| Lue3       | F      | 1215                               | 11.3         | 10.75                     | Kaiping     | 2         | Hetero                  |
| Lue1       | M      | 60                                 | 15.3         | 0.39                      | Valladolid  | 2         |                         |
| Lue3       | M      | 60                                 | 14.8         | 0.41                      | Kaiping     | 2         |                         |
| Lue6       | M      | 60                                 | 13.9         | 0.43                      | Union       | 2         |                         |
| Lue1       | M      | 60                                 | 12.6         | 0.48                      | Valladolid  | 2         |                         |
| Lue4       | M      | 60                                 | 11.7         | 0.51                      | Kaiping     | 2         |                         |

|      |   |      |      |       |           |   |        |
|------|---|------|------|-------|-----------|---|--------|
| Lue3 | M | 108  | 13.8 | 0.78  | Union     | 2 |        |
| Lue2 | M | 249  | 14.5 | 1.72  | Kaiping   | 2 |        |
| Lue4 | F | 60   | 12.5 | 0.48  | Gaohe     | 3 | Homo   |
| Lue4 | F | 177  | 13.2 | 1.34  | Aures     | 3 | Homo   |
| Lue3 | F | 378  | 12   | 3.15  | Canton    | 3 | Hetero |
| Lue6 | F | 563  | 15.2 | 3.70  | Canton    | 3 | Hetero |
| Lue3 | F | 485  | 12.7 | 3.82  | Canton    | 3 | Hetero |
| Lue1 | F | 536  | 13   | 4.12  | Viangchan | 3 | Hetero |
| Lue6 | F | 545  | 12   | 4.54  | Viangchan | 3 | Hetero |
| Lue4 | F | 651  | 13.7 | 4.75  | Canton    | 3 | Hetero |
| Lue4 | F | 644  | 12   | 5.37  | Canton    | 3 | Hetero |
| Lue6 | F | 796  | 13.3 | 5.98  | Canton    | 3 | Hetero |
| Lue4 | F | 824  | 12   | 6.87  | Canton    | 3 | Hetero |
| Lue3 | F | 747  | 9.7  | 7.70  | Canton    | 3 | Hetero |
| Lue2 | F | 1128 | 12.5 | 9.02  | Canton    | 3 | Hetero |
| Lue3 | F | 935  | 9.6  | 9.74  | Canton    | 3 | Hetero |
| Lue6 | F | 1385 | 12.2 | 11.35 | Canton    | 3 | Hetero |
| Lue2 | F | 1621 | 11.3 | 14.35 | Canton    | 3 | Hetero |
| Lue2 | M | 16   | 14.2 | 0.11  | Canton    | 3 |        |
| Lue3 | M | 60   | 15.3 | 0.39  | Canton    | 3 |        |
| Lue6 | M | 60   | 15.3 | 0.39  | Viangchan | 3 |        |
| Lue4 | M | 60   | 14.6 | 0.41  | Canton    | 3 |        |
| Lue3 | M | 60   | 14.1 | 0.43  | Canton    | 3 |        |
| Lue4 | M | 60   | 13.6 | 0.44  | Aures     | 3 |        |
| Lue4 | M | 60   | 13.2 | 0.45  | Gaohe     | 3 |        |
| Lue1 | M | 60   | 12.5 | 0.48  | Canton    | 3 |        |
| Lue3 | M | 60   | 12.2 | 0.49  | Canton    | 3 |        |
| Lue4 | M | 60   | 12.2 | 0.49  | Gaohe     | 3 |        |

|      |   |     |      |      |                 |   |
|------|---|-----|------|------|-----------------|---|
| Lue4 | M | 60  | 12   | 0.50 | Canton          | 3 |
| Lue2 | M | 186 | 12.3 | 1.51 | Mahidol         | 3 |
| Lue6 | F | 490 | 13   | 3.77 | Unknown variant |   |
| Lue6 | F | 603 | 14.2 | 4.25 | Unknown variant |   |
| Lue6 | F | 579 | 12.8 | 4.52 | Unknown variant |   |
| Lue6 | M | 408 | 14.7 | 2.78 | Unknown variant |   |
